# Supplementary material for: Challenges in the Management of Care for Patients with Multiple Sclerosis: A Qualitative Study from the Perspectives of Patients, Family Caregivers, and Healthcare Providers
Source: Research Square preprint supplement (doi:10.21203/rs.3.rs-7105887/v1), 2025-08-21
Supplement: Supplementary file 1 [file 86ddf6254cf9cbf3ea90b045.docx]

Sample Semi-Structured Interview Questions

This study is part of the findings of a larger research project (a PhD dissertation in nursing).

*Questions for Patients with MS (Multiple Sclerosis):

1. Please describe your experience regarding your care needs due to MS (at different stages such as the time of diagnosis, hospitalization, and at home).

2. Please share your experience regarding your care needs resulting from MS in different dimensions, including physical, psychological/emotional, spiritual, and social (economic, occupational, and family) aspects.

*Questions for Family Caregivers:

1. Please describe the problems your patient faced due to MS at different stages, such as the time of diagnosis, hospitalization, and at home.

2. Please share your experience regarding your own care needs resulting from your patient’s MS in different dimensions, including physical, psychological/emotional, spiritual, and social (economic, occupational, and family) aspects.

*Questions for Members of the Care Team:

1. What needs and challenges have you encountered when caring for patients with MS?

2. In your opinion, what are the reasons for these challenges?

3. In your opinion, what needs did your patient have that were not adequately addressed during the treatment process?

4. Please describe your experience regarding the care needs of MS patients in different dimensions, including physical, psychological/emotional, spiritual, and social (economic, occupational, and family) aspects.
